# Supplementary material for: Identification of cucumber circular RNAs responsive to salt stress
Source: BMC Plant Biol. 2019 Apr 27;19:164. doi: 10.1186/s12870-019-1712-3 (PMC6486992; doi:10.1186/s12870-019-1712-3)
Supplement: Supplementary file 12 — Table S12. miRNAs sponged by significantly differentially expressed circRNAs and their mRNA targets in leaf. (XLSX 39 kb) [file 12870_2019_1712_MOESM12_ESM.xlsx]

## Sheet: sheet1
circRNA	log2FC	target_miRNA	target_mRNA	short_description	attribution	COG_class	COG_class_annotation	GO_annotation	KEGG_annotation	KOG_class	KOG_class_annotation	Pfam_annotation	Swissprot_annotation	eggNOG_class	eggNOG_class_annotation	nr_annotation
Chr3:14927566|14953753	3.29842	csa-miRn6-3p	Csa4G038770	40S ribosomal protein	Translation	[J]	Translation, ribosomal structure and biogenesis	Biological Process: ribosomal small subunit assembly (GO:0000028);; Molecular Function: structural constituent of ribosome (GO:0003735);; Cellular Component: nucleus (GO:0005634);; Cellular Component: plasma membrane (GO:0005886);; Biological Process: translation (GO:0006412);; Cellular Component: chloroplast (GO:0009507);; Biological Process: response to salt stress (GO:0009651);; Cellular Compo…	K02998|1.10655e-180|csv:101212340|40S ribosomal protein SA-like; K02998 small subunit ribosomal protein SAe (A)	[J]	Translation, ribosomal structure and biogenesis	Ribosomal protein S2	Uncharacterized protein GN=PRUPE_ppa009383mg OS=Prunus persica (Peach) PE=4 SV=1	J	Translation, ribosomal structure and biogenesis	PREDICTED: 40S ribosomal protein SA-like [Cucumis sativus]
Chr3:14927566|14953753	3.29842	csa-miRn6-3p	Csa6G187950	50S ribosomal protein	Translation	[J]	Translation, ribosomal structure and biogenesis	Cellular Component: plastid large ribosomal subunit (GO:0000311);; Molecular Function: structural constituent of ribosome (GO:0003735);; Cellular Component: nucleus (GO:0005634);; Biological Process: translation (GO:0006412);; Molecular Function: poly(U) RNA binding (GO:0008266);; Cellular Component: chloroplast thylakoid membrane (GO:0009535);; Cellular Component: chloroplast stroma (GO:0009570)…	K02926|1.90134e-170|csv:101210440|50S ribosomal protein L4, chloroplastic-like; K02926 large subunit ribosomal protein L4 (A)	[J]	Translation, ribosomal structure and biogenesis	Ribosomal protein L4/L1 family;; Cyclophilin type peptidyl-prolyl cis-trans isomerase/CLD	Uncharacterized protein GN=PRUPE_ppa009351mg OS=Prunus persica (Peach) PE=4 SV=1	J	Translation, ribosomal structure and biogenesis	PREDICTED: 50S ribosomal protein L4, chloroplastic-like [Cucumis sativus]
Chr3:14927566|14953753	3.29842	csa-miRn6-3p	Csa3G826700	60S ribosomal protein L34	Translation	--	--	Cellular Component: intracellular organelle (GO:0043229);;	--	--	--	Protein of unknown function (DUF1666)	60S ribosomal protein L34, putative GN=RCOM_0170220 OS=Ricinus communis (Castor bean) PE=4 SV=1	S	Function unknown	PREDICTED: uncharacterized protein LOC101211770 [Cucumis sativus]
Chr3:14927566|14953753	3.29842	csa-miRn6-3p	Csa5G585950	ABC transporter	Secondary metabolism	[V]	Defense mechanisms	Biological Process: response to superoxide (GO:0000303);; Molecular Function: ATP binding (GO:0005524);; Cellular Component: plasma membrane (GO:0005886);; Biological Process: ATP catabolic process (GO:0006200);; Biological Process: ER to Golgi vesicle-mediated transport (GO:0006888);; Molecular Function: xenobiotic-transporting ATPase activity (GO:0008559);; Biological Process: toxin catabolic p…	K05658|0|csv:101202823|ABC transporter B family member 4-like; K05658 ATP-binding cassette, subfamily B (MDR/TAP), member 1 [EC:3.6.3.44] (A)	[Q]	Secondary metabolites biosynthesis, transport and catabolism	ABC transporter transmembrane region;; ABC transporter;; RecF/RecN/SMC N terminal domain;; AAA domain;; P-loop containing region of AAA domain;; AAA ATPase domain;; Predicted ATPase of the ABC class;; AAA domain;; Protein of unknown function, DUF258;; Zeta toxin;; AAA domain (dynein-related subfamily);; Protein of unknown function (DUF1602)	Multidrug/pheromone exporter, MDR family, ABC transporter family GN=POPTRDRAFT_834831 OS=Populus trichocarpa (Western balsam poplar) PE=2 SV=1	Q	Secondary metabolites biosynthesis, transport and catabolism	PREDICTED: ABC transporter B family member 4-like [Cucumis sativus]
Chr3:14927566|14953753	3.29842	csa-miRn6-3p	Csa7G051310	Acyl-CoA acyltransferase	Secondary metabolism	--	--	Molecular Function: transferase activity, transferring acyl groups (GO:0016746);;	--	--	--	Wax ester synthase-like Acyl-CoA acyltransferase domain	Predicted protein GN=POPTRDRAFT_825450 OS=Populus trichocarpa (Western balsam poplar) PE=4 SV=1	S	Function unknown	PREDICTED: O-acyltransferase WSD1-like [Cucumis sativus]
Chr3:14927566|14953753	3.29842	csa-miRn6-3p	Csa3G307680	Acyl-Esterase	Secondary metabolism	--	--	--	--	--	--	GDSL/SGNH-like Acyl-Esterase family found in Pmr5 and Cas1p	Uncharacterized protein GN=PRUPE_ppa007406mg OS=Prunus persica (Peach) PE=4 SV=1	S	Function unknown	PREDICTED: uncharacterized protein LOC101220526 [Cucumis sativus]
Chr3:14927566|14953753	3.29842	csa-miRn6-3p	Csa3G912940	bax inhibitor	Signal transduction	[R]	General function prediction only	Biological Process: very long-chain fatty acid metabolic process (GO:0000038);; Biological Process: MAPK cascade (GO:0000165);; Molecular Function: protein binding (GO:0005515);; Cellular Component: nuclear envelope (GO:0005635);; Cellular Component: endoplasmic reticulum (GO:0005783);; Cellular Component: plasma membrane (GO:0005886);; Biological Process: protein targeting to membrane (GO:000661…	--	[V]	Defense mechanisms	Inhibitor of apoptosis-promoting Bax1	Predicted protein OS=Populus trichocarpa (Western balsam poplar) PE=4 SV=1	T	Signal transduction mechanisms	PREDICTED: bax inhibitor 1-like isoform 2 [Cucumis sativus]
Chr3:14927566|14953753	3.29842	csa-miRn6-3p	Csa3G168390	bHLH147-like	Transcription	--	--	Biological Process: nitrogen compound metabolic process (GO:0006807);; Biological Process: cellular metabolic process (GO:0044237);; Biological Process: organic substance metabolic process (GO:0071704);;	--	--	--	--	Putative uncharacterized protein GN=VIT_05s0077g00750 OS=Vitis vinifera (Grape) PE=4 SV=1	K	Transcription	PREDICTED: transcription factor bHLH147-like [Cucumis sativus]
Chr3:14927566|14953753	3.29842	csa-miRn6-3p	Csa4G377720	bZIP	Transcription	--	--	Molecular Function: sequence-specific DNA binding transcription factor activity (GO:0003700);; Biological Process: regulation of transcription, DNA-templated (GO:0006355);; Molecular Function: sequence-specific DNA binding (GO:0043565);;	--	--	--	bZIP transcription factor;; Basic region leucine zipper	Uncharacterized protein GN=PRUPE_ppa024363mg OS=Prunus persica (Peach) PE=4 SV=1	K	Transcription	PREDICTED: protein ABSCISIC ACID-INSENSITIVE 5-like [Cucumis sativus]
Chr3:14927566|14953753	3.29842	csa-miRn6-3p	Csa3G019980	C2H2-type zinc finger protein	Transcription	--	--	--	--	[R]	General function prediction only	C2H2-type zinc finger;; C2H2-type zinc finger;; Zinc finger, C2H2 type	Predicted protein GN=POPTRDRAFT_757026 OS=Populus trichocarpa (Western balsam poplar) PE=4 SV=1	R	General function prediction only	PREDICTED: zinc finger protein ZAT9-like [Cucumis sativus]
Chr3:14927566|14953753	3.29842	csa-miRn6-3p	Csa4G172540	Calcium-dependent protein kinase	Signal transduction	[RTKL]	--	Molecular Function: calmodulin-dependent protein kinase activity (GO:0004683);; Molecular Function: calcium-dependent protein kinase C activity (GO:0004698);; Molecular Function: calcium ion binding (GO:0005509);; Molecular Function: ATP binding (GO:0005524);; Cellular Component: nucleus (GO:0005634);; Cellular Component: cytoplasm (GO:0005737);; Cellular Component: plasma membrane (GO:0005886);;…	K13412|0|csv:101208990|calcium-dependent protein kinase 7-like; K13412 calcium-dependent protein kinase [EC:2.7.11.1] (A)	[T]	Signal transduction mechanisms	Protein kinase domain;; Protein tyrosine kinase;; EF hand;; EF-hand domain pair;; EF-hand domain pair;; EF-hand domain;; EF hand;; Kinase-like;; Lipopolysaccharide kinase (Kdo/WaaP) family	Calcium-dependent protein kinase, putative GN=RCOM_0750920 OS=Ricinus communis (Castor bean) PE=4 SV=1	T	Signal transduction mechanisms	PREDICTED: calcium-dependent protein kinase 7-like [Cucumis sativus]
Chr3:14927566|14953753	3.29842	csa-miRn6-3p	Csa1G366960	Carbohydrate transport and metabolism	Secondary metabolism	[G]	Carbohydrate transport and metabolism	Cellular Component: nucleus (GO:0005634);; Cellular Component: chloroplast (GO:0009507);;	--	--	--	--	Uncharacterized protein OS=Morella rubra PE=2 SV=1	S	Function unknown	PREDICTED: uncharacterized protein LOC101219508 [Cucumis sativus]
Chr3:14927566|14953753	3.29842	csa-miRn6-3p	Csa5G590040	chaperones		[O]	Posttranslational modification, protein turnover, chaperones	Molecular Function: nucleotide binding (GO:0000166);;		[O]	Posttranslational modification, protein turnover, chaperones	--	Putative uncharacterized protein GN=VIT_01s0010g02730 OS=Vitis vinifera (Grape) PE=4 SV=1	O	Posttranslational modification, protein turnover, chaperones	conserved hypothetical protein [Ricinus communis]
Chr3:14927566|14953753	3.29842	csa-miRn6-3p	Csa5G608280	CHUP1		--	--	Cellular Component: nucleus (GO:0005634);; Biological Process: rRNA processing (GO:0006364);; Cellular Component: chloroplast outer membrane (GO:0009707);; Biological Process: chloroplast relocation (GO:0009902);; Biological Process: thylakoid membrane organization (GO:0010027);; Biological Process: photosystem II assembly (GO:0010207);; Biological Process: regulation of protein dephosphorylation…	--	--	--	--	Putative uncharacterized protein GN=VIT_01s0011g02860 OS=Vitis vinifera (Grape) PE=4 SV=1	R	General function prediction only	PREDICTED: protein CHUP1, chloroplastic-like [Cucumis sativus]
Chr3:14927566|14953753	3.29842	csa-miRn6-3p	Csa2G380020	CLD		[O]	Posttranslational modification, protein turnover, chaperones	Molecular Function: isomerase activity (GO:0016853);; Biological Process: cellular protein metabolic process (GO:0044267);;	--	[O]	Posttranslational modification, protein turnover, chaperones	Cyclophilin type peptidyl-prolyl cis-trans isomerase/CLD;; Cyclophilin type peptidyl-prolyl cis-trans isomerase/CLD	Putative uncharacterized protein GN=VIT_04s0008g05090 OS=Vitis vinifera (Grape) PE=4 SV=1	O	Posttranslational modification, protein turnover, chaperones	PREDICTED: uncharacterized protein LOC101210345 [Cucumis sativus]
Chr3:14927566|14953753	3.29842	csa-miRn6-3p	Csa3G854250	CML41-like	Signal transduction	[TZDR]	--	--	K13448|1.06099e-90|csv:101229653|probable calcium-binding protein CML41-like; K13448 calcium-binding protein CML (A)	[T]	Signal transduction mechanisms	EF-hand domain pair;; EF hand;; EF-hand domain pair;; EF-hand domain;; EF hand	Putative uncharacterized protein GN=VIT_18s0001g11830 OS=Vitis vinifera (Grape) PE=2 SV=1	T	Signal transduction mechanisms	PREDICTED: probable calcium-binding protein CML41-like [Cucumis sativus]
Chr3:14927566|14953753	3.29842	csa-miRn6-3p	Csa6G501250	Coenzyme transport and metabolism.1	Signal transduction	[H]	Coenzyme transport and metabolism	--	--	--	--	--	Putative uncharacterized protein OS=Populus trichocarpa (Western balsam poplar) PE=2 SV=1	--	--	PREDICTED: uncharacterized protein LOC101214252 isoform 1 [Cucumis sativus]
Chr3:14927566|14953753	3.29842	csa-miRn6-3p	Csa3G852500	Coenzyme transport and metabolism.2	Signal transduction	[E]	Amino acid transport and metabolism	Molecular Function: catalytic activity (GO:0003824);; Biological Process: metabolic process (GO:0008152);; Molecular Function: pyridoxal phosphate binding (GO:0030170);;	--	[H]	Coenzyme transport and metabolism	--	Putative uncharacterized protein GN=VIT_18s0001g11350 OS=Vitis vinifera (Grape) PE=4 SV=1	H	Coenzyme transport and metabolism	PREDICTED: uncharacterized protein LOC101215138 [Cucumis sativus]
Chr3:14927566|14953753	3.29842	csa-miRn6-3p	Csa3G017060	Coiled-coil domain containing protein		--	--	Cellular Component: nucleosome (GO:0000786);; Molecular Function: DNA binding (GO:0003677);; Biological Process: nucleosome assembly (GO:0006334);;	--	[S]	Function unknown	Coiled-coil domain containing protein (DUF2052)	Putative uncharacterized protein GN=VIT_02s0012g00030 OS=Vitis vinifera (Grape) PE=4 SV=1	S	Function unknown	PREDICTED: uncharacterized protein LOC101229247 [Cucumis sativus]
Chr3:14927566|14953753	3.29842	csa-miRn6-3p	Csa5G647360	CPSF30-like		[R]	General function prediction only	Biological Process: mitotic cell cycle (GO:0000278);; Molecular Function: RNA binding (GO:0003723);; Molecular Function: endoribonuclease activity (GO:0004521);; Molecular Function: calmodulin binding (GO:0005516);; Cellular Component: mRNA cleavage and polyadenylation specificity factor complex (GO:0005847);; Biological Process: response to oxidative stress (GO:0006979);; Molecular Function: zin…	K14404|0|csv:101220043|cleavage and polyadenylation specificity factor CPSF30-like; K14404 cleavage and polyadenylation specificity factor subunit 4 (A)	[TA]	--	YT521-B-like domain	Uncharacterized protein OS=Glycine max (Soybean) PE=4 SV=1	A	RNA processing and modification	PREDICTED: cleavage and polyadenylation specificity factor CPSF30-like [Cucumis sativus]
Chr3:14927566|14953753	3.29842	csa-miRn6-3p	Csa1G589100	CRS1		--	--	Molecular Function: RNA binding (GO:0003723);; Cellular Component: plastid (GO:0009536);;	--	[L]	Replication, recombination and repair	CRS1 / YhbY (CRM) domain	Uncharacterized protein GN=PRUPE_ppa001111mg OS=Prunus persica (Peach) PE=4 SV=1	L	Replication, recombination and repair	PREDICTED: chloroplastic group IIA intron splicing facilitator CRS1, chloroplastic-like [Cucumis sativus]
Chr3:14927566|14953753	3.29842	csa-miRn6-3p	Csa6G502040	Cupin		--	--	Molecular Function: nutrient reservoir activity (GO:0045735);;	--	--	--	Cupin	PreproMP73 GN=CmMP73 OS=Cucurbita maxima (Pumpkin) PE=2 SV=1	R	General function prediction only	preproMP73 [Cucurbita maxima]
Chr3:14927566|14953753	3.29842	csa-miRn6-3p	Csa7G073750	Cyclin-dependent kinase inhibitor	Signal transduction	--	--	Cellular Component: male germ cell nucleus (GO:0001673);; Molecular Function: cyclin-dependent protein serine/threonine kinase inhibitor activity (GO:0004861);; Biological Process: cell cycle (GO:0007049);; Molecular Function: cyclin binding (GO:0030332);; Biological Process: negative regulation of cyclin-dependent protein serine/threonine kinase activity (GO:0045736);;	--	--	--	Cyclin-dependent kinase inhibitor	Putative uncharacterized protein GN=VIT_07s0031g00800 OS=Vitis vinifera (Grape) PE=4 SV=1	T	Signal transduction mechanisms	PREDICTED: cyclin-dependent kinase inhibitor 7-like [Cucumis sativus]
Chr3:14927566|14953753	3.29842	csa-miRn6-3p	Csa4G639780	CYPRO4-like		[U]	Intracellular trafficking, secretion, and vesicular transport	Biological Process: mitotic G2 phase (GO:0000085);; Cellular Component: nucleus (GO:0005634);; Cellular Component: cytosol (GO:0005829);; Cellular Component: plasma membrane (GO:0005886);; Biological Process: regulation of DNA replication (GO:0006275);; Biological Process: DNA methylation (GO:0006306);; Biological Process: chromatin silencing (GO:0006342);; Biological Process: cell proliferation …	--	[U]	Intracellular trafficking, secretion, and vesicular transport	VID27 cytoplasmic protein	Predicted protein GN=POPTRDRAFT_591944 OS=Populus trichocarpa (Western balsam poplar) PE=4 SV=1	U	Intracellular trafficking, secretion, and vesicular transport	PREDICTED: protein CYPRO4-like [Cucumis sativus]
Chr3:14927566|14953753	3.29842	csa-miRn6-3p	Csa2G432220	Cytochrome P450	Secondary metabolism	[Q]	Secondary metabolites biosynthesis, transport and catabolism	Molecular Function: binding (GO:0005488);; Molecular Function: oxidoreductase activity (GO:0016491);;	--	[Q]	Secondary metabolites biosynthesis, transport and catabolism	Cytochrome P450	Putative uncharacterized protein GN=VIT_16s0039g00920 OS=Vitis vinifera (Grape) PE=2 SV=1	Q	Secondary metabolites biosynthesis, transport and catabolism	PREDICTED: cytochrome P450 89A2-like [Cucumis sativus]
Chr3:14927566|14953753	3.29842	csa-miRn6-3p	Csa6G032470	Cytoskeleton.1	Cytoskeleton	--	--	Cellular Component: cytoplasm (GO:0005737);; Biological Process: defense response (GO:0006952);; Biological Process: response to oxidative stress (GO:0006979);; Biological Process: cellular process (GO:0009987);; Biological Process: regulation of biological process (GO:0050789);;	--	[Z]	Cytoskeleton	Regulator of Vps4 activity in the MVB pathway	Uncharacterized protein GN=PRUPE_ppa007059mg OS=Prunus persica (Peach) PE=4 SV=1	Z	Cytoskeleton	PREDICTED: uncharacterized protein LOC101211044 [Cucumis sativus]
Chr3:14927566|14953753	3.29842	csa-miRn6-3p	Csa3G872730	Cytoskeleton.2	Cytoskeleton	[S]	Function unknown	--	--	[Z]	Cytoskeleton	Protein of unknown function (DUF615)	Predicted protein GN=POPTRDRAFT_559845 OS=Populus trichocarpa (Western balsam poplar) PE=4 SV=1	Z	Cytoskeleton	PREDICTED: uncharacterized protein LOC101214378 [Cucumis sativus]
Chr3:14927566|14953753	3.29842	csa-miRn6-3p	Csa1G008440	DDT domain protein		--	--	Biological Process: nuclear-transcribed mRNA catabolic process (GO:0000956);; Molecular Function: aminoacyl-tRNA ligase activity (GO:0004812);; Cellular Component: nucleus (GO:0005634);; Biological Process: regulation of mitotic cell cycle (GO:0007346);;	--	--	--	DDT domain	Putative uncharacterized protein GN=VIT_17s0000g05430 OS=Vitis vinifera (Grape) PE=4 SV=1	S	Function unknown	PREDICTED: uncharacterized protein LOC101216302 [Cucumis sativus]
Chr3:14927566|14953753	3.29842	csa-miRn6-3p	Csa6G127410	DEAD/DEAH box helicase.1		[KL]	--	Molecular Function: DNA binding (GO:0003677);; Molecular Function: helicase activity (GO:0004386);; Molecular Function: protein kinase activity (GO:0004672);; Molecular Function: ATP binding (GO:0005524);; Cellular Component: nucleus (GO:0005634);; Cellular Component: plastid (GO:0009536);; Cellular Component: membrane (GO:0016020);;	--	[KL]	--	SNF2 family N-terminal domain;; Helicase conserved C-terminal domain;; Type III restriction enzyme, res subunit;; DEAD/DEAH box helicase	Uncharacterized protein OS=Glycine max (Soybean) PE=4 SV=1	L	Replication, recombination and repair	PREDICTED: putative DNA repair and recombination protein RAD26-like [Cucumis sativus]
Chr3:14927566|14953753	3.29842	csa-miRn6-3p	Csa3G855940	DEAD/DEAH box helicase.2		[LKJ]	--	Molecular Function: nucleic acid binding (GO:0003676);; Molecular Function: ATP binding (GO:0005524);; Cellular Component: nucleus (GO:0005634);; Molecular Function: ATP-dependent helicase activity (GO:0008026);;	K13181|0|csv:101203996|DEAD-box ATP-dependent RNA helicase 28-like; K13181 ATP-dependent RNA helicase DDX27 [EC:3.6.4.13] (A)	[A]	RNA processing and modification	DEAD/DEAH box helicase;; Helicase conserved C-terminal domain	Uncharacterized protein GN=PRUPE_ppa001893mg OS=Prunus persica (Peach) PE=4 SV=1	A	RNA processing and modification	PREDICTED: DEAD-box ATP-dependent RNA helicase 28-like [Cucumis sativus]
Chr3:14927566|14953753	3.29842	csa-miRn6-3p	Csa6G005170	DNA binding		--	--	Cellular Component: nucleosome (GO:0000786);; Molecular Function: DNA binding (GO:0003677);; Biological Process: nucleosome assembly (GO:0006334);;	--	--	--	--	Uncharacterized protein (Fragment) GN=OB04G17350 OS=Oryza brachyantha PE=4 SV=1	--	--	unknown [Medicago truncatula]
Chr3:14927566|14953753	3.29842	csa-miRn6-3p	Csa6G185330	DNA damage-binding protein 2		[R]	General function prediction only	Molecular Function: nucleotide binding (GO:0000166);; Molecular Function: DNA binding (GO:0003677);; Cellular Component: nucleus (GO:0005634);; Biological Process: DNA repair (GO:0006281);; Molecular Function: zinc ion binding (GO:0008270);; Biological Process: response to UV-B (GO:0010224);; Cellular Component: Cul4-RING E3 ubiquitin ligase complex (GO:0080008);;	K10140|0|csv:101212319|protein DAMAGED DNA-BINDING 2-like; K10140 DNA damage-binding protein 2 (A)	[S]	Function unknown	WD domain, G-beta repeat	Uncharacterized protein GN=PRUPE_ppa022497mg OS=Prunus persica (Peach) PE=4 SV=1	R	General function prediction only	PREDICTED: protein DAMAGED DNA-BINDING 2-like [Cucumis sativus]
Chr3:14927566|14953753	3.29842	csa-miRn6-3p	Csa3G690290	DNA topoisomerase 2-like		[L]	Replication, recombination and repair	Biological Process: cytokinesis by cell plate formation (GO:0000911);; Molecular Function: DNA binding (GO:0003677);; Molecular Function: DNA topoisomerase type II (ATP-hydrolyzing) activity (GO:0003918);; Molecular Function: ATP binding (GO:0005524);; Cellular Component: nucleus (GO:0005634);; Cellular Component: chromosome (GO:0005694);; Biological Process: DNA topological change (GO:0006265);;…	K03164|0|csv:101215950|DNA topoisomerase 2-like; K03164 DNA topoisomerase II [EC:5.99.1.3] (A)	[B]	Chromatin structure and dynamics	DNA gyrase/topoisomerase IV, subunit A;; DNA gyrase B;; Toprim domain;; Histidine kinase-, DNA gyrase B-, and HSP90-like ATPase	DNA topoisomerase 2 GN=VIT_13s0064g00560 OS=Vitis vinifera (Grape) PE=3 SV=1	B	Chromatin structure and dynamics	PREDICTED: LOW QUALITY PROTEIN: DNA topoisomerase 2-like [Cucumis sativus]
Chr3:14927566|14953753	3.29842	csa-miRn6-3p	Csa1G025270	DNA-binding protein HEXBP-like		[OU]	--	Molecular Function: binding (GO:0005488);;	--	[O]	Posttranslational modification, protein turnover, chaperones	Zinc knuckle	Uncharacterized protein OS=Glycine max (Soybean) PE=4 SV=1	O	Posttranslational modification, protein turnover, chaperones	PREDICTED: DNA-binding protein HEXBP-like, partial [Cucumis sativus]
Chr3:14927566|14953753	3.29842	csa-miRn6-3p	Csa4G050820			--	--	Cellular Component: plasma membrane (GO:0005886);;	--	--	--	Protein of unknown function (DUF1191)	Predicted protein GN=POPTRDRAFT_751249 OS=Populus trichocarpa (Western balsam poplar) PE=4 SV=1	R	General function prediction only	PREDICTED: uncharacterized protein LOC101207860 [Cucumis sativus]
Chr3:14927566|14953753	3.29842	csa-miRn6-3p	Csa1G599530			--	--	Cellular Component: nucleus (GO:0005634);;	--	--	--	Protein of unknown function (DUF1639)	Putative uncharacterized protein GN=VIT_06s0004g00430 OS=Vitis vinifera (Grape) PE=4 SV=1	S	Function unknown	PREDICTED: uncharacterized protein LOC101218228 [Cucumis sativus]
Chr3:14927566|14953753	3.29842	csa-miRn6-3p	Csa2G020850			--	--	--	--	--	--	Protein of unknown function (DUF3049)	Putative uncharacterized protein GN=RCOM_1430130 OS=Ricinus communis (Castor bean) PE=4 SV=1	S	Function unknown	conserved hypothetical protein [Ricinus communis]
Chr3:14927566|14953753	3.29842	csa-miRn6-3p	Csa3G149380			--	--	--	--	--	--	Protein of unknown function (DUF3049)	Predicted protein GN=POPTRDRAFT_566284 OS=Populus trichocarpa (Western balsam poplar) PE=4 SV=1	S	Function unknown	Uncharacterized protein isoform 1 [Theobroma cacao]
Chr3:14927566|14953753	3.29842	csa-miRn6-3p	Csa7G357030			[K]	Transcription	Biological Process: RNA splicing, via endonucleolytic cleavage and ligation (GO:0000394);; Molecular Function: nucleic acid binding (GO:0003676);; Biological Process: transcription from RNA polymerase II promoter (GO:0006366);; Biological Process: DNA mediated transformation (GO:0009294);; Molecular Function: transferase activity (GO:0016740);; Biological Process: cellular protein metabolic proce…	K03125|0|cmo:103497604|transcription initiation factor TFIID subunit 1; K03125 transcription initiation factor TFIID subunit 1 (A)	[K]	Transcription	Protein of unknown function (DUF3591);; Bromodomain;; TATA box-binding protein binding;; Ubiquitin family;; Ubiquitin-2 like Rad60 SUMO-like;; Zinc knuckle	Uncharacterized protein GN=PRUPE_ppa000092mg OS=Prunus persica (Peach) PE=4 SV=1	K	Transcription	hypothetical protein PRUPE_ppa000092mg [Prunus persica]
Chr3:14927566|14953753	3.29842	csa-miRn6-3p	Csa6G452650			--	--	--	--	--	--	Domain of unknown function (DUF4228)	Putative uncharacterized protein GN=VIT_08s0007g03260 OS=Vitis vinifera (Grape) PE=4 SV=1	S	Function unknown	PREDICTED: uncharacterized protein LOC101226128 [Cucumis sativus]
Chr3:14927566|14953753	3.29842	csa-miRn6-3p	Csa1G031790			--	--	--	--	--	--	Cotton fibre expressed protein;; Domain of unknown function (DUF4408)	Cotton fiber expressed protein OS=Medicago truncatula (Barrel medic) PE=4 SV=1	S	Function unknown	PREDICTED: uncharacterized protein LOC101216148 [Cucumis sativus]
Chr3:14927566|14953753	3.29842	csa-miRn6-3p	Csa7G388300			--	--	--	--	--	--	Protein of unknown function (DUF581)	Uncharacterized protein GN=PRUPE_ppa008958mg OS=Prunus persica (Peach) PE=4 SV=1	S	Function unknown	PREDICTED: uncharacterized protein LOC101203170 [Cucumis sativus]
Chr3:14927566|14953753	3.29842	csa-miRn6-3p	Csa4G507950	E3 ubiquitin-protein ligase	Transcription	[V]	Defense mechanisms	Biological Process: mitotic cell cycle (GO:0000278);; Biological Process: nuclear division (GO:0000280);; Biological Process: double-strand break repair via homologous recombination (GO:0000724);; Biological Process: cytokinesis by cell plate formation (GO:0000911);; Molecular Function: chromatin binding (GO:0003682);; Molecular Function: ubiquitin-protein transferase activity (GO:0004842);; Cell…	K10638|0|cmo:103486058|E3 ubiquitin-protein ligase ORTHRUS 2-like; K10638 E3 ubiquitin-protein ligase UHRF1 [EC:6.3.2.19] (A)	--	--	SAD/SRA domain;; Ring finger domain;; Zinc finger, C3HC4 type (RING finger);; Zinc finger, C3HC4 type (RING finger);; Zinc finger, C3HC4 type (RING finger)	Uncharacterized protein (Fragment) GN=PRUPE_ppa015406mg OS=Prunus persica (Peach) PE=4 SV=1	K	Transcription	PREDICTED: LOW QUALITY PROTEIN: E3 ubiquitin-protein ligase ORTHRUS 2-like [Cucumis sativus]
Chr3:14927566|14953753	3.29842	csa-miRn6-3p	Csa6G128630	ELMO domain-containing protein		--	--	--	--	--	--	--	--	--	--	PREDICTED: ELMO domain-containing protein A-like [Cucumis sativus]
Chr3:14927566|14953753	3.29842	csa-miRn6-3p	Csa6G448080	Epa5p		--	--	--	--	--	--	--	Putative uncharacterized protein GN=VOLCADRAFT_121342 OS=Volvox carteri (Green alga) PE=4 SV=1	--	--	Epa5p [Candida glabrata]
Chr3:14927566|14953753	3.29842	csa-miRn6-3p	Csa5G139630	ERF CRF4-like	Transcription	--	--	Molecular Function: protein binding (GO:0005515);; Biological Process: protein import into nucleus (GO:0006606);; Biological Process: cellular process (GO:0009987);; Biological Process: single-organism developmental process (GO:0044767);; Biological Process: system development (GO:0048731);;	--	--	--	AP2 domain	Putative uncharacterized protein GN=VIT_16s0050g02400 OS=Vitis vinifera (Grape) PE=4 SV=1	K	Transcription	PREDICTED: ethylene-responsive transcription factor CRF4-like [Cucumis sativus]
Chr3:14927566|14953753	3.29842	csa-miRn6-3p	Csa6G128610	ERF054	Transcription	--	--	Cellular Component: nucleosome (GO:0000786);; Molecular Function: DNA binding (GO:0003677);; Molecular Function: structural constituent of ribosome (GO:0003735);; Molecular Function: protein serine/threonine kinase activity (GO:0004674);; Molecular Function: ATP binding (GO:0005524);; Cellular Component: ribosome (GO:0005840);; Biological Process: nucleosome assembly (GO:0006334);; Biological Pro…	--	--	--	--	Uncharacterized protein GN=PGSC0003DMG400046004 OS=Solanum tuberosum (Potato) PE=4 SV=1	K	Transcription	PREDICTED: LOW QUALITY PROTEIN: ethylene-responsive transcription factor ERF054-like [Cucumis sativus]
Chr3:14927566|14953753	3.29842	csa-miRn6-3p	Csa7G065120	EXECUTER 1		--	--	Biological Process: response to singlet oxygen (GO:0000304);; Biological Process: cellular process (GO:0009987);; Biological Process: response to iron ion (GO:0010039);; Biological Process: singlet oxygen-mediated programmed cell death (GO:0010343);; Cellular Component: thylakoid membrane (GO:0042651);; Cellular Component: intracellular part (GO:0044424);; Biological Process: iron ion homeostasis…	--	--	--	Domain of unknown function (DUF3506)	Uncharacterized protein GN=PRUPE_ppa002360mg OS=Prunus persica (Peach) PE=4 SV=1	S	Function unknown	PREDICTED: protein EXECUTER 1, chloroplastic-like [Cucumis sativus]
Chr3:14927566|14953753	3.29842	csa-miRn6-3p	Csa5G430000	Exo70		--	--	Cellular Component: exocyst (GO:0000145);; Cellular Component: nucleus (GO:0005634);; Cellular Component: cytosol (GO:0005829);; Biological Process: exocytosis (GO:0006887);; Biological Process: plant-type cell wall modification (GO:0009827);; Biological Process: pollen tube growth (GO:0009860);;	K07195|0|csv:101224679|exocyst complex component 7-like; K07195 exocyst complex component 7 (A)	[U]	Intracellular trafficking, secretion, and vesicular transport	Exo70 exocyst complex subunit	Uncharacterized protein GN=PRUPE_ppa017989mg OS=Prunus persica (Peach) PE=4 SV=1	U	Intracellular trafficking, secretion, and vesicular transport	PREDICTED: exocyst complex component 7-like [Cucumis sativus]
Chr3:14927566|14953753	3.29842	csa-miRn6-3p	Csa5G650450	F-box/FBD/LRR-repeat protein		--	--	--	--	--	--	F-box domain	F-box family protein GN=POPTRDRAFT_786395 OS=Populus trichocarpa (Western balsam poplar) PE=2 SV=1	R	General function prediction only	PREDICTED: F-box/FBD/LRR-repeat protein At1g16930-like [Cucumis sativus]
Chr3:14927566|14953753	3.29842	csa-miRn6-3p	Csa3G119550			--	--	--	--	--	--	--	Uncharacterized protein GN=PRUPE_ppa021416mg OS=Prunus persica (Peach) PE=4 SV=1	S	Function unknown	PREDICTED: uncharacterized protein LOC101205780 [Cucumis sativus]
Chr3:14927566|14953753	3.29842	csa-miRn6-3p	Csa2G062670			NO_Anno_Result
Chr3:14927566|14953753	3.29842	csa-miRn6-3p	Csa1G042280			--	--	Biological Process: single-organism transport (GO:0044765);; Biological Process: organic substance transport (GO:0071702);;	--	--	--	--	Uncharacterized protein GN=Bathy13g00290 OS=Bathycoccus prasinos PE=4 SV=1	--	--	predicted protein [Bathycoccus prasinos]
Chr3:14927566|14953753	3.29842	csa-miRn6-3p	Csa1G046070			--	--	--	--	--	--	--	Putative uncharacterized protein GN=OsJ_33046 OS=Oryza sativa subsp. japonica (Rice) PE=4 SV=1	--	--	hypothetical protein MAA_04116 [Metarhizium anisopliae ARSEF 23]
Chr3:14927566|14953753	3.29842	csa-miRn6-3p	Csa5G167180			NO_Anno_Result
Chr3:14927566|14953753	3.29842	csa-miRn6-3p	Csa2G419970			--	--	--	--	--	--	--	Putative uncharacterized protein Sb04g008025 (Fragment) GN=Sb04g008025 OS=Sorghum bicolor (Sorghum) PE=4 SV=1	--	--	hypothetical protein SORBIDRAFT_04g008025 [Sorghum bicolor]
Chr3:14927566|14953753	3.29842	csa-miRn6-3p	Csa6G109630			NO_Anno_Result
Chr3:14927566|14953753	3.29842	csa-miRn6-3p	Csa6G525630			--	--	--	--	--	--	--	Uncharacterized protein GN=Bra013480 OS=Brassica rapa subsp. pekinensis (Chinese cabbage) PE=4 SV=1	S	Function unknown	predicted protein [Populus trichocarpa]
Chr3:14927566|14953753	3.29842	csa-miRn6-3p	Csa3G002870			NO_Anno_Result
Chr3:14927566|14953753	3.29842	csa-miRn6-3p	Csa3G740830			NO_Anno_Result
Chr3:14927566|14953753	3.29842	csa-miRn6-3p	Csa6G405900			NO_Anno_Result
Chr3:14927566|14953753	3.29842	csa-miRn6-3p	Csa4G119260			NO_Anno_Result
Chr3:14927566|14953753	3.29842	csa-miRn6-3p	Csa7G339700			NO_Anno_Result
Chr3:14927566|14953753	3.29842	csa-miRn6-3p	Csa5G381770			--	--	Biological Process: organelle organization (GO:0006996);; Biological Process: gene silencing (GO:0016458);; Biological Process: covalent chromatin modification (GO:0016569);; Biological Process: gene silencing by RNA (GO:0031047);; Biological Process: regulation of gene expression, epigenetic (GO:0040029);; Biological Process: macromolecule methylation (GO:0043414);; Biological Process: primary m…	--	--	--	--	Putative uncharacterized protein GN=OsI_31969 OS=Oryza sativa subsp. indica (Rice) PE=3 SV=1	--	--	hypothetical protein OsI_31969 [Oryza sativa Indica Group]
Chr3:14927566|14953753	3.29842	csa-miRn6-3p	Csa3G238220			--	--	Cellular Component: nucleosome (GO:0000786);; Molecular Function: DNA binding (GO:0003677);; Molecular Function: structural constituent of ribosome (GO:0003735);; Molecular Function: protein serine/threonine kinase activity (GO:0004674);; Molecular Function: ATP binding (GO:0005524);; Cellular Component: ribosome (GO:0005840);; Biological Process: nucleosome assembly (GO:0006334);; Biological Pro…	--	--	--	--	Uncharacterized protein GN=PGSC0003DMG400043625 OS=Solanum tuberosum (Potato) PE=4 SV=1	--	--	hypothetical protein PDIG_60830 [Penicillium digitatum PHI26]
Chr3:14927566|14953753	3.29842	csa-miRn6-3p	Csa1G605660			[E]	Amino acid transport and metabolism	Molecular Function: transporter activity (GO:0005215);; Biological Process: oligopeptide transport (GO:0006857);; Cellular Component: membrane (GO:0016020);;	--	[E]	Amino acid transport and metabolism	POT family	Uncharacterized protein GN=PRUPE_ppa023462mg OS=Prunus persica (Peach) PE=4 SV=1	P	Inorganic ion transport and metabolism	PREDICTED: LOW QUALITY PROTEIN: putative peptide/nitrate transporter At5g19640-like [Cucumis sativus]
Chr3:14927566|14953753	3.29842	csa-miRn6-3p	Csa7G037490			--	--	Molecular Function: binding (GO:0005488);;	--	--	--	--	Putative uncharacterized protein GN=VOLCADRAFT_121342 OS=Volvox carteri (Green alga) PE=4 SV=1	--	--	hypothetical protein CLUG_05252 [Clavispora lusitaniae ATCC 42720]
Chr3:14927566|14953753	3.29842	csa-miRn6-3p	Csa7G133420			NO_Anno_Result
Chr3:14927566|14953753	3.29842	csa-miRn6-3p	Csa2G192810			NO_Anno_Result
Chr3:14927566|14953753	3.29842	csa-miRn6-3p	Csa3G348940			--	--	--	--	--	--	--	Predicted protein GN=POPTRDRAFT_552964 OS=Populus trichocarpa (Western balsam poplar) PE=4 SV=1	S	Function unknown	predicted protein [Populus trichocarpa]
Chr3:14927566|14953753	3.29842	csa-miRn6-3p	Csa4G002580			--	--	--	--	--	--	Cotton fibre expressed protein	Putative uncharacterized protein GN=VIT_07s0005g01140 OS=Vitis vinifera (Grape) PE=4 SV=1	S	Function unknown	PREDICTED: uncharacterized protein LOC100245192 [Vitis vinifera]
Chr3:14927566|14953753	3.29842	csa-miRn6-3p	Csa6G361300			--	--	--	--	--	--	--	Putative uncharacterized protein GN=RCOM_0708150 OS=Ricinus communis (Castor bean) PE=4 SV=1	S	Function unknown	hypothetical protein RCOM_0708150 [Ricinus communis]
Chr3:14927566|14953753	3.29842	csa-miRn6-3p	Csa1G097640			NO_Anno_Result
Chr3:14927566|14953753	3.29842	csa-miRn6-3p	Csa5G107040			NO_Anno_Result
Chr3:14927566|14953753	3.29842	csa-miRn6-3p	Csa2G028470			NO_Anno_Result
Chr3:14927566|14953753	3.29842	csa-miRn6-3p	Csa5G643360	GDSL/SGNH-like Acyl-Esterase		--	--	--	--	--	--	GDSL/SGNH-like Acyl-Esterase family found in Pmr5 and Cas1p;; PMR5 N terminal Domain	Putative uncharacterized protein OS=Cucumis melo subsp. melo PE=4 SV=1	S	Function unknown	PREDICTED: uncharacterized protein LOC101210676 [Cucumis sativus]
Chr3:14927566|14953753	3.29842	csa-miRn6-3p	Csa1G062920	Glycosyl transferase.1		[G]	Carbohydrate transport and metabolism	Molecular Function: starch synthase activity (GO:0009011);; Cellular Component: amyloplast (GO:0009501);; Cellular Component: chloroplast (GO:0009507);; Biological Process: starch biosynthetic process (GO:0019252);; Molecular Function: starch binding (GO:2001070);;	--	--	--	Carbohydrate binding domain (family 25);; Starch synthase catalytic domain;; Glycosyl transferase 4-like domain;; Glycosyl transferases group 1	Starch synthase OS=Cucumis melo subsp. melo PE=3 SV=1	M	Cell wall/membrane/envelope biogenesis	PREDICTED: soluble starch synthase 3, chloroplastic/amyloplastic-like [Cucumis sativus]
Chr3:14927566|14953753	3.29842	csa-miRn6-3p	Csa6G045050	Glycosyl transferase.2		[GC]	--	Molecular Function: transferase activity, transferring glycosyl groups (GO:0016757);; Molecular Function: transferase activity, transferring hexosyl groups (GO:0016758);;	--	[GC]	--	UDP-glucoronosyl and UDP-glucosyl transferase;; Glycosyl transferase family 1	Putative uncharacterized protein GN=VIT_04s0044g01530 OS=Vitis vinifera (Grape) PE=3 SV=1	CG	--	PREDICTED: cyanidin-3-O-glucoside 2-O-glucuronosyltransferase-like [Cucumis sativus]
Chr3:14927566|14953753	3.29842	csa-miRn6-3p	Csa3G251930	heme oxygenase		--	--	Cellular Component: nucleosome (GO:0000786);; Molecular Function: DNA binding (GO:0003677);; Molecular Function: heme oxygenase (decyclizing) activity (GO:0004392);; Biological Process: nucleosome assembly (GO:0006334);; Biological Process: heme oxidation (GO:0006788);;	--	--	--	--	Uncharacterized protein (Fragment) GN=OB04G17350 OS=Oryza brachyantha PE=4 SV=1	--	--	expressed protein [Aureococcus anophagefferens]
Chr3:14927566|14953753	3.29842	csa-miRn6-3p	Csa6G087770	histone-lysine N-methyltransferase		[R]	General function prediction only	Molecular Function: methyltransferase activity (GO:0008168);; Biological Process: methylation (GO:0032259);; Biological Process: primary metabolic process (GO:0044238);; Biological Process: cellular macromolecule metabolic process (GO:0044260);; Molecular Function: metal ion binding (GO:0046872);;	--	[BK]	--	PHD-zinc-finger like domain;; SET domain;; PWWP domain;; PHD-like zinc-binding domain;; PHD-finger;; PHD-finger	Trithorax, putative GN=RCOM_0718450 OS=Ricinus communis (Castor bean) PE=4 SV=1	BK	--	PREDICTED: histone-lysine N-methyltransferase ATX3-like [Cucumis sativus]
Chr3:14927566|14953753	3.29842	csa-miRn6-3p	Csa4G005000	Hsp20		[O]	Posttranslational modification, protein turnover, chaperones	Biological Process: protein folding (GO:0006457);; Biological Process: response to stress (GO:0006950);; Biological Process: response to high light intensity (GO:0009644);; Biological Process: heat acclimation (GO:0010286);; Biological Process: response to hydrogen peroxide (GO:0042542);; Cellular Component: intracellular membrane-bounded organelle (GO:0043231);; Cellular Component: cytoplasmic p…	K13993|2.47388e-136|csv:101210969|26.5 kDa heat shock protein, mitochondrial-like; K13993 HSP20 family protein (A)	[O]	Posttranslational modification, protein turnover, chaperones	Hsp20/alpha crystallin family	Putative uncharacterized protein OS=Glycine max (Soybean) PE=2 SV=1	O	Posttranslational modification, protein turnover, chaperones	PREDICTED: 26.5 kDa heat shock protein, mitochondrial-like [Cucumis sativus]
Chr3:14927566|14953753	3.29842	csa-miRn6-3p	Csa6G382990	Kinesin	Cytoskeleton	[Z]	Cytoskeleton	Molecular Function: nucleotide binding (GO:0000166);; Molecular Function: microtubule motor activity (GO:0003777);; Molecular Function: ATP binding (GO:0005524);; Cellular Component: mitochondrion (GO:0005739);; Cellular Component: kinesin complex (GO:0005871);; Cellular Component: microtubule (GO:0005874);; Cellular Component: microtubule associated complex (GO:0005875);; Cellular Component: pla…	K11498|0|csv:101218642|uncharacterized LOC101218642; K11498 centromeric protein E (A)	[Z]	Cytoskeleton	Kinesin motor domain	Uncharacterized protein GN=PRUPE_ppa000463mg OS=Prunus persica (Peach) PE=4 SV=1	Z	Cytoskeleton	PREDICTED: uncharacterized protein LOC101218642 [Cucumis sativus]
Chr3:14927566|14953753	3.29842	csa-miRn6-3p	Csa7G374620	Lipoxygenase		--	--	--	K00454|0|cmo:103492581|linoleate 9S-lipoxygenase-like; K00454 lipoxygenase [EC:1.13.11.12] (A)	--	--	Lipoxygenase;; PLAT/LH2 domain	Uncharacterized protein GN=PRUPE_ppa026489mg OS=Prunus persica (Peach) PE=4 SV=1	S	Function unknown	PREDICTED: linoleate 9S-lipoxygenase 1-like [Cucumis sativus]
Chr3:14927566|14953753	3.29842	csa-miRn6-3p	Csa6G434320	magnesium-chelatase		[H]	Coenzyme transport and metabolism	Molecular Function: ATP binding (GO:0005524);; Cellular Component: chloroplast thylakoid (GO:0009534);; Cellular Component: chloroplast stroma (GO:0009570);; Biological Process: cytokinin metabolic process (GO:0009690);; Cellular Component: magnesium chelatase complex (GO:0010007);; Biological Process: photosynthesis (GO:0015979);; Biological Process: chlorophyll biosynthetic process (GO:0015995)…	K03404|0|csv:101208461|magnesium-chelatase subunit ChlD, chloroplastic-like; K03404 magnesium chelatase subunit D [EC:6.6.1.1] (A)	--	--	von Willebrand factor type A domain;; Magnesium chelatase, subunit ChlI;; von Willebrand factor type A domain;; Sigma-54 interaction domain	Uncharacterized protein GN=PRUPE_ppa001804mg OS=Prunus persica (Peach) PE=4 SV=1	H	Coenzyme transport and metabolism	PREDICTED: magnesium-chelatase subunit ChlD, chloroplastic-like [Cucumis sativus]
Chr3:14927566|14953753	3.29842	csa-miRn6-3p	Csa5G139900	membrane-associated kinase		--	--	--	--	--	--	--	Uncharacterized protein GN=PRUPE_ppa007251mg OS=Prunus persica (Peach) PE=4 SV=1	R	General function prediction only	PREDICTED: probable membrane-associated kinase regulator 5-like [Cucumis sativus]
Chr3:14927566|14953753	3.29842	csa-miRn6-3p	Csa3G121600	metal ion transporter		--	--	Cellular Component: nucleus (GO:0005634);; Biological Process: metal ion transport (GO:0030001);; Molecular Function: metal ion binding (GO:0046872);;	--	[P]	Inorganic ion transport and metabolism	Heavy-metal-associated domain	Uncharacterized protein OS=Glycine max (Soybean) PE=2 SV=1	P	Inorganic ion transport and metabolism	PREDICTED: uncharacterized protein LOC101218112 [Cucumis sativus]
Chr3:14927566|14953753	3.29842	csa-miRn6-3p	Csa7G009800	methyltransferase-like protein 16		[R]	General function prediction only	Cellular Component: nucleus (GO:0005634);; Cellular Component: mitochondrion (GO:0005739);; Biological Process: circadian rhythm (GO:0007623);; Molecular Function: methyltransferase activity (GO:0008168);; Biological Process: methylation (GO:0032259);; Biological Process: photoperiodism, flowering (GO:0048573);;	K06970|0|csv:101205279|methyltransferase-like protein 16 homolog; K06970 23S rRNA (adenine1618-N6)-methyltransferase [EC:2.1.1.181] (A)	[S]	Function unknown	Protein of unknown function (DUF890)	Putative uncharacterized protein GN=VIT_03s0038g02100 OS=Vitis vinifera (Grape) PE=4 SV=1	S	Function unknown	PREDICTED: methyltransferase-like protein 16 homolog [Cucumis sativus]
Chr3:14927566|14953753	3.29842	csa-miRn6-3p	Csa2G361440	methyltransferase-like protein 2		--	--	Cellular Component: nucleus (GO:0005634);; Biological Process: metabolic process (GO:0008152);; Molecular Function: methyltransferase activity (GO:0008168);; Molecular Function: S-adenosylmethionine-dependent methyltransferase activity (GO:0008757);;	--	[KT]	--	MT-A70	Putative uncharacterized protein GN=VIT_18s0001g11990 OS=Vitis vinifera (Grape) PE=4 SV=1	KT	--	PREDICTED: LOW QUALITY PROTEIN: methyltransferase-like protein 2-like [Cucumis sativus]
Chr3:14927566|14953753	3.29842	csa-miRn6-3p	Csa6G429120	methyltransferase-like protein 22		[QR]	--	Cellular Component: cytoplasm (GO:0005737);; Molecular Function: methyltransferase activity (GO:0008168);; Biological Process: methylation (GO:0032259);;	--	--	--	Putative methyltransferase;; Methyltransferase small domain	Uncharacterized protein GN=Bra000533 OS=Brassica rapa subsp. pekinensis (Chinese cabbage) PE=4 SV=1	R	General function prediction only	PREDICTED: methyltransferase-like protein 22-like [Cucumis sativus]
Chr3:14927566|14953753	3.29842	csa-miRn6-3p	Csa4G578870	microfibrillar-associated protein		--	--	Cellular Component: extracellular region (GO:0005576);; Cellular Component: nucleus (GO:0005634);; Cellular Component: chloroplast (GO:0009507);;	K13110|0|cmo:103486019|microfibrillar-associated protein 1; K13110 microfibrillar-associated protein 1 (A)	[Z]	Cytoskeleton	Splicing factor, Prp19-binding domain	Uncharacterized protein GN=PRUPE_ppa005985mg OS=Prunus persica (Peach) PE=4 SV=1	Z	Cytoskeleton	PREDICTED: microfibrillar-associated protein 1-like [Cucumis sativus]
Chr3:14927566|14953753	3.29842	csa-miRn6-3p	Csa1G529120	Myb-like.1	Transcription	[KAD]	--	Biological Process: regulation of cellular process (GO:0050794);;	K09422|9.24556e-170|cmo:103497228|protein ODORANT1; K09422 myb proto-oncogene protein, plant (A)	[K]	Transcription	Myb-like DNA-binding domain;; Myb-like DNA-binding domain	Predicted protein GN=MYB022 OS=Populus trichocarpa (Western balsam poplar) PE=4 SV=1	K	Transcription	PREDICTED: uncharacterized protein LOC101224124 [Cucumis sativus]
Chr3:14927566|14953753	3.29842	csa-miRn6-3p	Csa4G000700	Myb-like.2	Transcription	[M]	Cell wall/membrane/envelope biogenesis	Biological Process: cytokinesis by cell plate formation (GO:0000911);; Molecular Function: DNA binding (GO:0003677);; Molecular Function: double-stranded telomeric DNA binding (GO:0003691);; Molecular Function: sequence-specific DNA binding transcription factor activity (GO:0003700);; Cellular Component: nucleus (GO:0005634);; Biological Process: response to salt stress (GO:0009651);; Biological …	K09422|2.10678e-155|cmo:103494819|telomere repeat-binding factor 1; K09422 myb proto-oncogene protein, plant (A)	--	--	Myb-like DNA-binding domain;; linker histone H1 and H5 family	Putative MYB transcription factor GN=myb10 OS=Rosa hybrid cultivar PE=2 SV=1	B	Chromatin structure and dynamics	PREDICTED: telomere repeat-binding factor 1-like [Cucumis sativus]
Chr3:14927566|14953753	3.29842	csa-miRn6-3p	Csa1G472480	Myb-like.3	Transcription	--	--	--	--	[K]	Transcription	Myb/SANT-like DNA-binding domain;; Alcohol dehydrogenase transcription factor Myb/SANT-like	Putative uncharacterized protein GN=VITISV_011968 OS=Vitis vinifera (Grape) PE=4 SV=1	K	Transcription	PREDICTED: uncharacterized protein LOC101231641 [Cucumis sativus]
Chr3:14927566|14953753	3.29842	csa-miRn6-3p	Csa4G290190	Myb-like.4	Transcription	[R]	General function prediction only	--	--	--	--	Bromodomain;; Myb-like DNA-binding domain	DNA binding protein, putative GN=RCOM_1576560 OS=Ricinus communis (Castor bean) PE=4 SV=1	K	Transcription	PREDICTED: uncharacterized protein LOC101213195 [Cucumis sativus]
Chr3:14927566|14953753	3.29842	csa-miRn6-3p	Csa6G043490	Myb-like.5	Transcription	--	--	Biological Process: regulation of transcription, DNA-templated (GO:0006355);;	--	[K]	Transcription	Myb/SANT-like DNA-binding domain;; Myb-like DNA-binding domain;; Myb/SANT-like DNA-binding domain;; Alcohol dehydrogenase transcription factor Myb/SANT-like;; Myb-like DNA-binding domain	Uncharacterized protein OS=Glycine max (Soybean) PE=4 SV=1	K	Transcription	PREDICTED: uncharacterized protein LOC101205810 [Cucumis sativus]
Chr3:14927566|14953753	3.29842	csa-miRn6-3p	Csa6G079210	Myb-like.6	Transcription	[T]	Signal transduction mechanisms	Biological Process: signal transduction (GO:0007165);; Biological Process: multicellular organismal development (GO:0007275);; Biological Process: metabolic process (GO:0008152);; Biological Process: single-organism cellular process (GO:0044763);; Biological Process: regulation of cellular process (GO:0050794);; Biological Process: response to stimulus (GO:0050896);;	--	[K]	Transcription	Response regulator receiver domain;; Myb-like DNA-binding domain	Uncharacterized protein (Fragment) GN=PRUPE_ppa023185mg OS=Prunus persica (Peach) PE=4 SV=1	K	Transcription	PREDICTED: uncharacterized protein LOC101203888 [Cucumis sativus]
Chr3:14927566|14953753	3.29842	csa-miRn6-3p	Csa7G058030	NAM protein		--	--	Molecular Function: DNA binding (GO:0003677);; Molecular Function: sequence-specific DNA binding transcription factor activity (GO:0003700);; Cellular Component: nucleus (GO:0005634);; Biological Process: regulation of transcription, DNA-templated (GO:0006355);; Biological Process: xylem development (GO:0010089);; Biological Process: regulation of programmed cell death (GO:0043067);; Biological P…	--	--	--	No apical meristem (NAM) protein	Uncharacterized protein OS=Glycine max (Soybean) PE=4 SV=1	S	Function unknown	PREDICTED: NAC transcription factor NAM-B2-like [Cucumis sativus]
Chr3:14927566|14953753	3.29842	csa-miRn6-3p	Csa3G207890	Nitrite/Sulfite reductase		[P]	Inorganic ion transport and metabolism	Cellular Component: mitochondrion (GO:0005739);; Cellular Component: chloroplast stroma (GO:0009570);; Biological Process: response to nitrate (GO:0010167);; Biological Process: nitrate transport (GO:0015706);; Cellular Component: membrane (GO:0016020);; Biological Process: cysteine biosynthetic process (GO:0019344);; Molecular Function: heme binding (GO:0020037);; Biological Process: electron tr…	K00366|0|csv:101217505|NIR; ferredoxin--nitrite reductase, chloroplastic-like; K00366 ferredoxin-nitrite reductase [EC:1.7.7.1] (A)	[P]	Inorganic ion transport and metabolism	Nitrite and sulphite reductase 4Fe-4S domain;; Nitrite/Sulfite reductase ferredoxin-like half domain	Ferredoxin--nitrite reductase, chloroplast, putative GN=RCOM_0813440 OS=Ricinus communis (Castor bean) PE=4 SV=1	P	Inorganic ion transport and metabolism	PREDICTED: ferredoxin--nitrite reductase, chloroplastic-like [Cucumis sativus]
Chr3:14927566|14953753	3.29842	csa-miRn6-3p	Csa1G043050	NRDE-2		--	--	Biological Process: nuclear-transcribed mRNA catabolic process (GO:0000956);; Cellular Component: nucleus (GO:0005634);; Biological Process: regulation of mitotic cell cycle (GO:0007346);; Biological Process: vernalization response (GO:0010048);;	--	--	--	NRDE-2, necessary for RNA interference	Uncharacterized protein GN=PRUPE_ppa000464mg OS=Prunus persica (Peach) PE=4 SV=1	S	Function unknown	PREDICTED: UPF0614 protein C14orf102-like [Cucumis sativus]
Chr3:14927566|14953753	3.29842	csa-miRn6-3p	Csa7G033370	Nuclear protein Es2		--	--	Cellular Component: nucleus (GO:0005634);; Cellular Component: mitochondrion (GO:0005739);; Biological Process: D-xylose metabolic process (GO:0042732);;	K13118|0|csv:101212240|protein DGCR14 homolog; K13118 protein DGCR14 (A)	[R]	General function prediction only	Nuclear protein Es2	Predicted protein GN=POPTRDRAFT_552692 OS=Populus trichocarpa (Western balsam poplar) PE=4 SV=1	R	General function prediction only	PREDICTED: protein DGCR14 homolog [Cucumis sativus]
Chr3:14927566|14953753	3.29842	csa-miRn6-3p	Csa3G455120	nucleosome	Transcription	--	--	Cellular Component: nucleosome (GO:0000786);; Molecular Function: DNA binding (GO:0003677);; Biological Process: nucleosome assembly (GO:0006334);;	--	--	--	--	Uncharacterized protein (Fragment) GN=OB04G17350 OS=Oryza brachyantha PE=4 SV=1	K	Transcription	unknown [Medicago truncatula]
Chr3:14927566|14953753	3.29842	csa-miRn6-3p	Csa4G293090	nucleus		--	--	Cellular Component: nucleus (GO:0005634);; Cellular Component: cell part (GO:0044464);;	--	--	--	--	Uncharacterized protein GN=PRUPE_ppa000364mg OS=Prunus persica (Peach) PE=4 SV=1	R	General function prediction only	PREDICTED: uncharacterized protein LOC101220913 isoform 1 [Cucumis sativus]
Chr3:14927566|14953753	3.29842	csa-miRn6-3p	Csa3G182050	O-glucosyltransferase		--	--	Cellular Component: extracellular region (GO:0005576);; Cellular Component: endosome (GO:0005768);; Cellular Component: Golgi apparatus (GO:0005794);; Cellular Component: trans-Golgi network (GO:0005802);;	K13667|0|csv:101213997|O-glucosyltransferase rumi homolog; K13667 protein glucosyltransferase [EC:2.4.1.-] (A)	[R]	General function prediction only	Glycosyl transferase family 90	KDEL motif-containing protein 1, putative GN=RCOM_1495960 OS=Ricinus communis (Castor bean) PE=4 SV=1	R	General function prediction only	PREDICTED: O-glucosyltransferase rumi homolog [Cucumis sativus]
Chr3:14927566|14953753	3.29842	csa-miRn6-3p	Csa6G410680	outer envelope pore protein 37		--	--	Molecular Function: ion channel activity (GO:0005216);; Cellular Component: nucleus (GO:0005634);; Cellular Component: mitochondrion (GO:0005739);; Biological Process: cation transport (GO:0006812);; Cellular Component: chloroplast inner membrane (GO:0009706);; Molecular Function: porin activity (GO:0015288);; Cellular Component: integral component of chloroplast outer membrane (GO:0031359);; Mol…	--	--	--	--	Putative uncharacterized protein OS=Populus trichocarpa (Western balsam poplar) PE=2 SV=1	S	Function unknown	PREDICTED: outer envelope pore protein 37, chloroplastic-like [Cucumis sativus]
Chr3:14927566|14953753	3.29842	csa-miRn6-3p	Csa1G662830	Pentatricopeptide repeat-containing protein		--	--	Biological Process: response to molecule of bacterial origin (GO:0002237);; Molecular Function: DNA binding (GO:0003677);; Molecular Function: protein serine/threonine kinase activity (GO:0004674);; Molecular Function: ATP binding (GO:0005524);; Cellular Component: nucleus (GO:0005634);; Cellular Component: mitochondrion (GO:0005739);; Biological Process: protein phosphorylation (GO:0006468);; Bi…	--	--	--	SAP domain	Pentatricopeptide repeat-containing protein, putative GN=RCOM_0611010 OS=Ricinus communis (Castor bean) PE=4 SV=1	R	General function prediction only	PREDICTED: uncharacterized protein LOC101209618 [Cucumis sativus]
Chr3:14927566|14953753	3.29842	csa-miRn6-3p	Csa3G144110	PERK8-like	Signal transduction	[RTKL]	--	Molecular Function: protein serine/threonine kinase activity (GO:0004674);; Molecular Function: ATP binding (GO:0005524);; Biological Process: protein phosphorylation (GO:0006468);; Biological Process: cell wall macromolecule catabolic process (GO:0016998);;	--	--	--	Protein kinase domain;; Protein tyrosine kinase;; LysM domain	Uncharacterized protein GN=PRUPE_ppa002872mg OS=Prunus persica (Peach) PE=4 SV=1	T	Signal transduction mechanisms	PREDICTED: proline-rich receptor-like protein kinase PERK8-like [Cucumis sativus]
Chr3:14927566|14953753	3.29842	csa-miRn6-3p	Csa1G424880	PHD-finger.1	Transcription	--	--	Molecular Function: binding (GO:0005488);; Molecular Function: protein binding (GO:0005515);; Biological Process: response to auxin (GO:0009733);; Molecular Function: sequence-specific DNA binding (GO:0043565);; Biological Process: positive regulation of transcription, DNA-templated (GO:0045893);;	--	[R]	General function prediction only	PHD-finger;; Homeobox domain;; Homeobox KN domain	Putative uncharacterized protein GN=VIT_11s0103g00650 OS=Vitis vinifera (Grape) PE=2 SV=1	R	General function prediction only	PREDICTED: pathogenesis-related homeodomain protein-like [Cucumis sativus]
Chr3:14927566|14953753	3.29842	csa-miRn6-3p	Csa3G113340	PHD-finger.2	Transcription	--	--	Molecular Function: DNA binding (GO:0003677);; Molecular Function: ATP binding (GO:0005524);; Cellular Component: nucleus (GO:0005634);; Cellular Component: cytosol (GO:0005829);; Biological Process: regulation of transcription, DNA-templated (GO:0006355);; Molecular Function: zinc ion binding (GO:0008270);; Biological Process: chromatin modification (GO:0016568);; Molecular Function: hydrolase a…	--	[R]	General function prediction only	Domain of unknown function (DUF3594);; PHD-finger	PHD5 OS=Morella rubra PE=2 SV=1	K	Transcription	PREDICTED: PHD finger protein Alfin1-like [Cucumis sativus]
Chr3:14927566|14953753	3.29842	csa-miRn6-3p	Csa3G198510	PHD-finger.3	Transcription	--	--	Molecular Function: binding (GO:0005488);; Biological Process: positive regulation of cell proliferation (GO:0008284);; Biological Process: embryo sac egg cell differentiation (GO:0009560);; Molecular Function: sequence-specific DNA binding (GO:0043565);; Biological Process: post-translational protein modification (GO:0043687);; Biological Process: primary metabolic process (GO:0044238);; Biologi…	--	[R]	General function prediction only	PHD-finger;; S-100/ICaBP type calcium binding domain	Uncharacterized protein GN=PRUPE_ppa023106mg OS=Prunus persica (Peach) PE=4 SV=1	R	General function prediction only	PREDICTED: uncharacterized protein LOC101204775 [Cucumis sativus]
Chr3:14927566|14953753	3.29842	csa-miRn6-3p	Csa3G535640	Pistil-specific extensin-like protein		--	--	--	--	--	--	--	Pistil-specific extensin-like protein GN=MTR_4g017240 OS=Medicago truncatula (Barrel medic) PE=4 SV=1	--	--	hypothetical protein CHGG_10452 [Chaetomium globosum CBS 148.51]
Chr3:14927566|14953753	3.29842	csa-miRn6-3p	Csa1G136780	PLATZ		--	--	--	--	--	--	PLATZ transcription factor	Putative uncharacterized protein GN=RCOM_0475810 OS=Ricinus communis (Castor bean) PE=4 SV=1	S	Function unknown	PREDICTED: uncharacterized protein LOC101204359 [Cucumis sativus]
Chr3:14927566|14953753	3.29842	csa-miRn6-3p	Csa7G397590	poly [ADP-ribose] polymerase 2-like		--	--	Molecular Function: nucleic acid binding (GO:0003676);; Molecular Function: NAD+ ADP-ribosyltransferase activity (GO:0003950);; Cellular Component: nucleus (GO:0005634);; Cellular Component: mitochondrion (GO:0005739);; Biological Process: double-strand break repair (GO:0006302);; Biological Process: protein ADP-ribosylation (GO:0006471);; Biological Process: pollination (GO:0009856);; Biological…	K10798|0|csv:101207394|poly [ADP-ribose] polymerase 2-like; K10798 poly [ADP-ribose] polymerase [EC:2.4.2.30] (A)	[KLO]	--	Poly(ADP-ribose) polymerase catalytic domain;; Poly(ADP-ribose) polymerase, regulatory domain;; WGR domain;; SAP domain	Uncharacterized protein GN=PRUPE_ppa002806mg OS=Prunus persica (Peach) PE=4 SV=1	L	Replication, recombination and repair	PREDICTED: poly [ADP-ribose] polymerase 2-like [Cucumis sativus]
Chr3:14927566|14953753	3.29842	csa-miRn6-3p	Csa1G073640	Polyphenol oxidase		--	--	Cellular Component: chloroplast (GO:0009507);; Cellular Component: thylakoid (GO:0009579);; Molecular Function: oxidoreductase activity (GO:0016491);; Biological Process: single-organism metabolic process (GO:0044710);;	--	--	--	Protein of unknown function (DUF_B2219);; Common central domain of tyrosinase;; Polyphenol oxidase middle domain	Polyphenol oxidase GN=PPO3 OS=Populus trichocarpa (Western balsam poplar) PE=3 SV=1	S	Function unknown	PREDICTED: polyphenol oxidase, chloroplastic-like [Cucumis sativus]
Chr3:14927566|14953753	3.29842	csa-miRn6-3p	Csa1G524700	protein binding		--	--	Molecular Function: protein binding (GO:0005515);; Biological Process: cellular process (GO:0009987);;	K13171|3.75847e-174|csv:101207842|uncharacterized LOC101207842; K13171 serine/arginine repetitive matrix protein 1 (A)	[AR]	--	PWI domain	Uncharacterized protein GN=PRUPE_ppa001408mg OS=Prunus persica (Peach) PE=4 SV=1	A	RNA processing and modification	PREDICTED: uncharacterized protein LOC101207842 [Cucumis sativus]
Chr3:14927566|14953753	3.29842	csa-miRn6-3p	Csa2G108620	protein FEZ-like	Transcription	--	--	Cellular Component: nucleus (GO:0005634);; Biological Process: response to auxin (GO:0009733);; Biological Process: cellular process (GO:0009987);; Biological Process: single-organism process (GO:0044699);; Biological Process: positive regulation of asymmetric cell division (GO:0045770);; Biological Process: somatic stem cell division (GO:0048103);; Biological Process: root cap development (GO:00…	--	--	--	No apical meristem (NAM) protein	NAC domain-containing protein, putative GN=RCOM_0836330 OS=Ricinus communis (Castor bean) PE=4 SV=1	K	Transcription	PREDICTED: protein FEZ-like [Cucumis sativus]
Chr3:14927566|14953753	3.29842	csa-miRn6-3p	Csa6G104100	PRP1 splicing factor		[R]	General function prediction only	Biological Process: mRNA splicing, via spliceosome (GO:0000398);; Cellular Component: nucleus (GO:0005634);; Biological Process: response to cold (GO:0009409);; Cellular Component: amyloplast starch grain (GO:0009568);; Biological Process: starch biosynthetic process (GO:0019252);;	K12855|0|csv:101228644|pre-mRNA-processing factor 6-like; K12855 pre-mRNA-processing factor 6 (A)	[A]	RNA processing and modification	PRP1 splicing factor, N-terminal;; Tetratricopeptide repeat;; Tetratricopeptide repeat;; Tetratricopeptide repeat;; Tetratricopeptide repeat;; TPR repeat;; Tetratricopeptide repeat;; Tetratricopeptide repeat	Uncharacterized protein GN=PRUPE_ppa000712mg OS=Prunus persica (Peach) PE=4 SV=1	A	RNA processing and modification	PREDICTED: pre-mRNA-processing factor 6-like [Cucumis sativus]
Chr3:14927566|14953753	3.29842	csa-miRn6-3p	Csa7G451960	PWWP		--	--	--	--	--	--	PWWP domain	Putative uncharacterized protein GN=VITISV_024170 OS=Vitis vinifera (Grape) PE=4 SV=1	S	Function unknown	hypothetical protein VITISV_024170 [Vitis vinifera]
Chr3:14927566|14953753	3.29842	csa-miRn6-3p	Csa4G007640	random slug protein 5-like		--	--	Molecular Function: transporter activity (GO:0005215);; Cellular Component: nucleus (GO:0005634);; Biological Process: transport (GO:0006810);; Biological Process: cysteine biosynthetic process (GO:0019344);;	--	[I]	Lipid transport and metabolism	CRAL/TRIO domain;; Divergent CRAL/TRIO domain;; CRAL/TRIO, N-terminal domain	Uncharacterized protein GN=PRUPE_ppa010136mg OS=Prunus persica (Peach) PE=4 SV=1	I	Lipid transport and metabolism	PREDICTED: random slug protein 5-like [Cucumis sativus]
Chr3:14927566|14953753	3.29842	csa-miRn6-3p	Csa1G073880	receptor kinase VII.1		--	--	Molecular Function: protein kinase activity (GO:0004672);; Molecular Function: kinase activity (GO:0016301);; Biological Process: cellular metabolic process (GO:0044237);; Molecular Function: organic cyclic compound binding (GO:0097159);; Molecular Function: heterocyclic compound binding (GO:1901363);;	--	--	--	--	Predicted protein GN=POPTRDRAFT_939756 OS=Populus trichocarpa (Western balsam poplar) PE=3 SV=1	--	--	PREDICTED: L-type lectin-domain containing receptor kinase VII.1-like [Cucumis sativus]
Chr3:14927566|14953753	3.29842	csa-miRn6-3p	Csa3G646600	Remorin		--	--	--	--	--	--	Remorin, C-terminal region	DNA binding protein, putative GN=RCOM_0417930 OS=Ricinus communis (Castor bean) PE=4 SV=1	S	Function unknown	PREDICTED: uncharacterized protein LOC101207750 [Cucumis sativus]
Chr3:14927566|14953753	3.29842	csa-miRn6-3p	Csa3G895700	Retinal pigment epithelial membrane protein	Secondary metabolism	[Q]	Secondary metabolites biosynthesis, transport and catabolism	Molecular Function: nucleic acid binding (GO:0003676);; Molecular Function: protein serine/threonine kinase activity (GO:0004674);; Molecular Function: ATP binding (GO:0005524);; Biological Process: protein phosphorylation (GO:0006468);; Molecular Function: methyltransferase activity (GO:0008168);; Molecular Function: zinc ion binding (GO:0008270);; Biological Process: methylation (GO:0032259);;	--	[Q]	Secondary metabolites biosynthesis, transport and catabolism	Retinal pigment epithelial membrane protein	Putative uncharacterized protein GN=VIT_04s0008g03480 OS=Vitis vinifera (Grape) PE=4 SV=1	Q	Secondary metabolites biosynthesis, transport and catabolism	PREDICTED: carotenoid 9,10(9&apos;,10&apos;)-cleavage dioxygenase 1-like [Cucumis sativus]
Chr3:14927566|14953753	3.29842	csa-miRn6-3p	Csa3G118730	RhoGAP.1	Signal transduction	--	--	Cellular Component: intracellular (GO:0005622);; Cellular Component: cytoplasm (GO:0005737);; Cellular Component: plasma membrane (GO:0005886);; Biological Process: signal transduction (GO:0007165);; Cellular Component: secondary cell wall (GO:0009531);; Biological Process: plant-type cell wall organization (GO:0009664);; Biological Process: auxin polar transport (GO:0009926);; Biological Process…	--	[T]	Signal transduction mechanisms	RhoGAP domain;; P21-Rho-binding domain	Predicted protein GN=POPTRDRAFT_1098697 OS=Populus trichocarpa (Western balsam poplar) PE=4 SV=1	T	Signal transduction mechanisms	PREDICTED: uncharacterized LOC101203614 [Cucumis sativus]
Chr3:14927566|14953753	3.29842	csa-miRn6-3p	Csa3G777030	RhoGAP.2	Signal transduction	--	--	Cellular Component: intracellular (GO:0005622);; Biological Process: signal transduction (GO:0007165);;	--	[T]	Signal transduction mechanisms	RhoGAP domain;; P21-Rho-binding domain	Uncharacterized protein GN=PRUPE_ppa004100mg OS=Prunus persica (Peach) PE=4 SV=1	T	Signal transduction mechanisms	PREDICTED: uncharacterized protein LOC101203345 [Cucumis sativus]
Chr3:14927566|14953753	3.29842	csa-miRn6-3p	Csa3G646520	Ribosomal protein S2	Translation	[J]	Translation, ribosomal structure and biogenesis	Biological Process: ribosomal small subunit assembly (GO:0000028);; Molecular Function: structural constituent of ribosome (GO:0003735);; Cellular Component: nucleus (GO:0005634);; Cellular Component: plasma membrane (GO:0005886);; Biological Process: translation (GO:0006412);; Cellular Component: chloroplast (GO:0009507);; Biological Process: response to salt stress (GO:0009651);; Cellular Compo…	K02998|1.50945e-178|csv:101226997|40S ribosomal protein SA-like; K02998 small subunit ribosomal protein SAe (A)	[J]	Translation, ribosomal structure and biogenesis	Ribosomal protein S2	Uncharacterized protein GN=PRUPE_ppa009383mg OS=Prunus persica (Peach) PE=4 SV=1	J	Translation, ribosomal structure and biogenesis	PREDICTED: 40S ribosomal protein SA-like [Cucumis sativus]
Chr3:14927566|14953753	3.29842	csa-miRn6-3p	Csa5G648700	ribosomal RNA processing protein 36		--	--	Biological Process: mRNA splicing, via spliceosome (GO:0000398);; Cellular Component: nucleus (GO:0005634);; Biological Process: rRNA processing (GO:0006364);; Biological Process: protein maturation (GO:0051604);;	K14795|1.10009e-138|csv:101232014|ribosomal RNA processing protein 36 homolog; K14795 ribosomal RNA-processing protein 36 (A)	[S]	Function unknown	Domain of unknown function (DUF947)	Putative uncharacterized protein GN=VIT_02s0025g04400 OS=Vitis vinifera (Grape) PE=4 SV=1	S	Function unknown	PREDICTED: ribosomal RNA processing protein 36 homolog [Cucumis sativus]
Chr3:14927566|14953753	3.29842	csa-miRn6-3p	Csa1G006330	RING/Ubox zinc finger	Transcription	--	--	--	--	[K]	Transcription	RING/Ubox like zinc-binding domain;; Zinc finger, C3HC4 type (RING finger)	Uncharacterized protein OS=Glycine max (Soybean) PE=4 SV=1	K	Transcription	PREDICTED: uncharacterized LOC101211244 [Cucumis sativus]
Chr3:14927566|14953753	3.29842	csa-miRn6-3p	Csa4G129570	RLP kinase.1	Signal transduction	--	--	Biological Process: metabolic process (GO:0008152);; Molecular Function: kinase activity (GO:0016301);;	--	[T]	Signal transduction mechanisms	Carbohydrate-binding protein of the ER;; Protein tyrosine kinase;; Protein kinase domain;; Di-glucose binding within endoplasmic reticulum	Uncharacterized protein (Fragment) GN=PRUPE_ppa016279mg OS=Prunus persica (Peach) PE=4 SV=1	T	Signal transduction mechanisms	PREDICTED: receptor-like protein kinase FERONIA-like [Cucumis sativus]
Chr3:14927566|14953753	3.29842	csa-miRn6-3p	Csa5G640550	RLP kinase.2	Signal transduction	--	--	Molecular Function: transferase activity, transferring phosphorus-containing groups (GO:0016772);; Biological Process: cellular metabolic process (GO:0044237);; Biological Process: primary metabolic process (GO:0044238);; Biological Process: single-organism cellular process (GO:0044763);; Biological Process: response to stimulus (GO:0050896);; Biological Process: organic substance metabolic proce…	--	[T]	Signal transduction mechanisms	Carbohydrate-binding protein of the ER;; Di-glucose binding within endoplasmic reticulum;; Protein tyrosine kinase;; Protein kinase domain	Kinase, putative GN=RCOM_0917060 OS=Ricinus communis (Castor bean) PE=3 SV=1	T	Signal transduction mechanisms	PREDICTED: receptor-like protein kinase FERONIA-like [Cucumis sativus]
Chr3:14927566|14953753	3.29842	csa-miRn6-3p	Csa5G640540	RLP kinase.3	Signal transduction	[RTKL]	--	Molecular Function: protein kinase activity (GO:0004672);; Cellular Component: plasma membrane (GO:0005886);; Biological Process: glucose catabolic process (GO:0006007);; Biological Process: response to stress (GO:0006950);; Biological Process: response to osmotic stress (GO:0006970);; Cellular Component: plasmodesma (GO:0009506);; Biological Process: anatomical structure morphogenesis (GO:000965…	--	[T]	Signal transduction mechanisms	Protein tyrosine kinase;; Protein kinase domain;; Carbohydrate-binding protein of the ER;; Di-glucose binding within endoplasmic reticulum	Kinase, putative GN=RCOM_0917060 OS=Ricinus communis (Castor bean) PE=3 SV=1	R	General function prediction only	PREDICTED: LOW QUALITY PROTEIN: receptor-like protein kinase FERONIA-like [Cucumis sativus]
Chr3:14927566|14953753	3.29842	csa-miRn6-3p	Csa6G141350	Senescence regulator		--	--	--	--	--	--	Senescence regulator	Uncharacterized protein GN=Solyc11g069450.1 OS=Solanum lycopersicum (Tomato) PE=4 SV=1	S	Function unknown	PREDICTED: uncharacterized protein LOC101215539 [Cucumis sativus]
Chr3:14927566|14953753	3.29842	csa-miRn6-3p	Csa3G151390	Snf2	Transcription	[KL]	--	Molecular Function: binding (GO:0005488);; Biological Process: response to stress (GO:0006950);; Biological Process: post-embryonic development (GO:0009791);; Biological Process: RNA metabolic process (GO:0016070);; Biological Process: regulation of gene expression, epigenetic (GO:0040029);; Biological Process: cellular macromolecule metabolic process (GO:0044260);; Biological Process: single-org…	--	[BK]	--	SNF2 family N-terminal domain;; Snf2-ATP coupling, chromatin remodelling complex;; Helicase conserved C-terminal domain	Uncharacterized protein (Fragment) GN=PRUPE_ppa015204mg OS=Prunus persica (Peach) PE=4 SV=1	K	Transcription	PREDICTED: LOW QUALITY PROTEIN: uncharacterized LOC101206586, partial [Cucumis sativus]
Chr3:14927566|14953753	3.29842	csa-miRn6-3p	Csa4G454660	SRK2B-like	Signal transduction	[RTKL]	--	Molecular Function: protein serine/threonine kinase activity (GO:0004674);; Molecular Function: ATP binding (GO:0005524);; Biological Process: protein phosphorylation (GO:0006468);;	K14498|0|csv:101209783|serine/threonine-protein kinase SRK2B-like; K14498 serine/threonine-protein kinase SRK2 [EC:2.7.11.1] (A)	[T]	Signal transduction mechanisms	Protein kinase domain;; Protein tyrosine kinase	Serine/threonine protein kinase GN=MTR_8g095330 OS=Medicago truncatula (Barrel medic) PE=4 SV=1	T	Signal transduction mechanisms	PREDICTED: serine/threonine-protein kinase SRK2B-like [Cucumis sativus]
Chr3:14927566|14953753	3.29842	csa-miRn6-3p	Csa7G180130	Stig1		--	--	--	--	--	--	Stigma-specific protein, Stig1	Predicted protein (Fragment) GN=POPTRDRAFT_175791 OS=Populus trichocarpa (Western balsam poplar) PE=4 SV=1	R	General function prediction only	PREDICTED: uncharacterized protein LOC101232665 [Cucumis sativus]
Chr3:14927566|14953753	3.29842	csa-miRn6-3p	Csa6G324820	STK.1		--	--	Cellular Component: nucleosome (GO:0000786);; Molecular Function: nucleic acid binding (GO:0003676);; Molecular Function: DNA binding (GO:0003677);; Molecular Function: protein serine/threonine kinase activity (GO:0004674);; Molecular Function: ATP binding (GO:0005524);; Biological Process: nucleosome assembly (GO:0006334);; Biological Process: protein phosphorylation (GO:0006468);; Molecular Fun…	--	--	--	--	Uncharacterized protein GN=PGSC0003DMG400046004 OS=Solanum tuberosum (Potato) PE=4 SV=1	--	--	Contains weak similarity to an unknown protein T23E18.5 gi|6573728 from Arabidopsis thaliana BAC T23E18 gb|AC009978. EST gb|W43440 comes from this gene [Arabidopsis thaliana]
Chr3:14927566|14953753	3.29842	csa-miRn6-3p	Csa3G645890	STK.2		--	--	Cellular Component: nucleosome (GO:0000786);; Molecular Function: DNA binding (GO:0003677);; Molecular Function: structural constituent of ribosome (GO:0003735);; Molecular Function: protein serine/threonine kinase activity (GO:0004674);; Molecular Function: ATP binding (GO:0005524);; Cellular Component: ribosome (GO:0005840);; Biological Process: nucleosome assembly (GO:0006334);; Biological Pro…	--	--	--	--	Uncharacterized protein GN=PGSC0003DMG400043625 OS=Solanum tuberosum (Potato) PE=4 SV=1	--	--	hypothetical protein PDIG_67850 [Penicillium digitatum PHI26]
Chr3:14927566|14953753	3.29842	csa-miRn6-3p	Csa1G007860	STPK.1	Signal transduction	[RTKL]	--	Molecular Function: protein kinase C activity (GO:0004697);; Molecular Function: ATP binding (GO:0005524);; Cellular Component: ribosome (GO:0005840);; Biological Process: protein phosphorylation (GO:0006468);; Biological Process: response to stress (GO:0006950);; Biological Process: response to abiotic stimulus (GO:0009628);;	K04688|0|csv:101214867|serine/threonine-protein kinase AtPK2/AtPK19-like; K04688 p70 ribosomal S6 kinase [EC:2.7.11.1] (A)	[RT]	--	Protein kinase domain;; Protein tyrosine kinase;; Kinase-like;; Protein kinase C terminal domain;; RIO1 family	Uncharacterized protein GN=PRUPE_ppa005280mg OS=Prunus persica (Peach) PE=4 SV=1	T	Signal transduction mechanisms	PREDICTED: serine/threonine-protein kinase AtPK2/AtPK19-like [Cucumis sativus]
Chr3:14927566|14953753	3.29842	csa-miRn6-3p	Csa6G092520	STPK.2	Signal transduction	--	--	Cellular Component: nucleosome (GO:0000786);; Molecular Function: nucleic acid binding (GO:0003676);; Molecular Function: DNA binding (GO:0003677);; Molecular Function: structural constituent of ribosome (GO:0003735);; Molecular Function: protein serine/threonine kinase activity (GO:0004674);; Molecular Function: ATP binding (GO:0005524);; Cellular Component: ribosome (GO:0005840);; Biological Pr…	--	--	--	--	Putative uncharacterized protein OS=Arabidopsis thaliana (Mouse-ear cress) PE=4 SV=1	--	--	hypothetical protein PDIG_64730 [Penicillium digitatum PHI26]
Chr3:14927566|14953753	3.29842	csa-miRn6-3p	Csa3G232950	STPK.3	Signal transduction	[RTKL]	--	Molecular Function: ATP binding (GO:0005524);; Cellular Component: nucleus (GO:0005634);; Cellular Component: plasma membrane (GO:0005886);; Biological Process: protein phosphorylation (GO:0006468);; Molecular Function: RNA polymerase II carboxy-terminal domain kinase activity (GO:0008353);; Biological Process: cell division (GO:0051301);;	--	[D]	Cell cycle control, cell division, chromosome partitioning	Protein kinase domain;; Protein tyrosine kinase	Predicted protein GN=POPTRDRAFT_834104 OS=Populus trichocarpa (Western balsam poplar) PE=2 SV=1	T	Signal transduction mechanisms	PREDICTED: probable serine/threonine-protein kinase At1g54610-like [Cucumis sativus]
Chr3:14927566|14953753	3.29842	csa-miRn6-3p	Csa7G281360	stress responsive protein		--	--	Biological Process: response to stress (GO:0006950);; Biological Process: regulation of mitotic cell cycle (GO:0007346);; Biological Process: vernalization response (GO:0010048);;	--	[O]	Posttranslational modification, protein turnover, chaperones	--	Putative uncharacterized protein GN=RCOM_0686080 OS=Ricinus communis (Castor bean) PE=4 SV=1	O	Posttranslational modification, protein turnover, chaperones	PREDICTED: uncharacterized protein LOC101213388 [Cucumis sativus]
Chr3:14927566|14953753	3.29842	csa-miRn6-3p	Csa1G423110	Syntaxin 6		--	--	Cellular Component: nucleus (GO:0005634);;	--	--	--	Syntaxin 6, N-terminal	Uncharacterized protein OS=Glycine max (Soybean) PE=4 SV=1	S	Function unknown	PREDICTED: uncharacterized protein LOC101219019 [Cucumis sativus]
Chr3:14927566|14953753	3.29842	csa-miRn6-3p	Csa5G605000	TCP15	Transcription	--	--	Biological Process: response to hormone (GO:0009725);;	--	--	--	TCP family transcription factor	Putative uncharacterized protein GN=VIT_01s0026g02200 OS=Vitis vinifera (Grape) PE=4 SV=1	K	Transcription	PREDICTED: LOW QUALITY PROTEIN: transcription factor TCP15-like [Cucumis sativus]
Chr3:14927566|14953753	3.29842	csa-miRn6-3p	Csa1G015870	TF IIE		--	--	--	--	--	--	--	Uncharacterized protein (Fragment) GN=PRUPE_ppa024616mg OS=Prunus persica (Peach) PE=4 SV=1	S	Function unknown	PREDICTED: general transcription factor IIE subunit 1-like [Cucumis sativus]
Chr3:14927566|14953753	3.29842	csa-miRn6-3p	Csa6G137600	TPR repeat		[R]	General function prediction only	--	--	--	--	TPR repeat;; Tetratricopeptide repeat;; Tetratricopeptide repeat;; Anaphase-promoting complex, cyclosome, subunit 3;; Tetratricopeptide repeat;; Tetratricopeptide repeat	Uncharacterized protein GN=PRUPE_ppa018824mg OS=Prunus persica (Peach) PE=4 SV=1	R	General function prediction only	PREDICTED: uncharacterized protein LOC101219918 [Cucumis sativus]
Chr3:14927566|14953753	3.29842	csa-miRn6-3p	Csa2G013230	translation initiation factor		[MJ]	--	Molecular Function: translation initiation factor activity (GO:0003743);; Cellular Component: cytosol (GO:0005829);; Biological Process: regulation of translational initiation (GO:0006446);; Biological Process: nucleotide biosynthetic process (GO:0009165);; Biological Process: RNA metabolic process (GO:0016070);; Molecular Function: nucleotidyltransferase activity (GO:0016779);;	K03240|0|cmo:103495740|translation initiation factor eIF-2B subunit epsilon; K03240 translation initiation factor eIF-2B subunit epsilon (A)	[J]	Translation, ribosomal structure and biogenesis	eIF4-gamma/eIF5/eIF2-epsilon;; Nucleotidyl transferase;; Bacterial transferase hexapeptide (six repeats)	eIF4-gamma/eIF5/eIF2-epsilon domain-containing protein OS=Cucumis melo subsp. melo PE=4 SV=1	J	Translation, ribosomal structure and biogenesis	PREDICTED: translation initiation factor eIF-2B subunit epsilon-like [Cucumis sativus]
Chr3:14927566|14953753	3.29842	csa-miRn6-3p	Csa1G423320	U3 small nucleolar RNA-associated protein	Translation	--	--	Cellular Component: nucleolus (GO:0005730);; Biological Process: protein import into nucleus (GO:0006606);; Biological Process: rRNA transcription (GO:0009303);; Cellular Component: plastid (GO:0009536);; Biological Process: embryo sac development (GO:0009553);; Biological Process: embryo development (GO:0009790);;	K14774|0|csv:101225460|U3 small nucleolar RNA-associated protein 25-like; K14774 U3 small nucleolar RNA-associated protein 25 (A)	[S]	Function unknown	Protein of unknown function (DUF1253)	Putative uncharacterized protein GN=VIT_11s0103g00230 OS=Vitis vinifera (Grape) PE=4 SV=1	S	Function unknown	PREDICTED: U3 small nucleolar RNA-associated protein 25-like [Cucumis sativus]
Chr3:14927566|14953753	3.29842	csa-miRn6-3p	Csa6G511820			--	--	--	--	--	--	--	Uncharacterized protein OS=Glycine max (Soybean) PE=4 SV=1	S	Function unknown	PREDICTED: uncharacterized protein LOC101204826 [Cucumis sativus]
Chr3:14927566|14953753	3.29842	csa-miRn6-3p	Csa5G129300			--	--	Cellular Component: nucleus (GO:0005634);;	--	[S]	Function unknown	Hepatocellular carcinoma-associated antigen 59	Uncharacterized protein GN=PRUPE_ppa009015mg OS=Prunus persica (Peach) PE=4 SV=1	S	Function unknown	PREDICTED: uncharacterized LOC101215146 [Cucumis sativus]
Chr3:14927566|14953753	3.29842	csa-miRn6-3p	Csa3G110030			--	--	--	--	--	--	--	Uncharacterized protein GN=PRUPE_ppa024829mg OS=Prunus persica (Peach) PE=4 SV=1	S	Function unknown	Uncharacterized protein TCM_006157 [Theobroma cacao]
Chr3:14927566|14953753	3.29842	csa-miRn6-3p	Csa1G022530			--	--	--	--	[A]	RNA processing and modification	--	Uncharacterized protein GN=PRUPE_ppa012428mg OS=Prunus persica (Peach) PE=4 SV=1	A	RNA processing and modification	hypothetical protein PRUPE_ppa012428mg [Prunus persica]
Chr3:14927566|14953753	3.29842	csa-miRn6-3p	Csa2G354620			--	--	--	--	--	--	--	Uncharacterized protein GN=PRUPE_ppa012205mg OS=Prunus persica (Peach) PE=4 SV=1	S	Function unknown	PREDICTED: uncharacterized protein LOC101210927 isoform 1 [Cucumis sativus]
Chr3:14927566|14953753	3.29842	csa-miRn6-3p	Csa3G236550			--	--	Cellular Component: intracellular membrane-bounded organelle (GO:0043231);;	--	--	--	--	Uncharacterized protein GN=PRUPE_ppa001903mg OS=Prunus persica (Peach) PE=4 SV=1	S	Function unknown	PREDICTED: uncharacterized LOC101220770 [Cucumis sativus]
Chr3:14927566|14953753	3.29842	csa-miRn6-3p	Csa5G638400			--	--	--	--	--	--	--	Putative uncharacterized protein GN=VITISV_019275 OS=Vitis vinifera (Grape) PE=4 SV=1	S	Function unknown	PREDICTED: uncharacterized protein LOC101204708 [Cucumis sativus]
Chr3:14927566|14953753	3.29842	csa-miRn6-3p	Csa3G636390			--	--	Biological Process: polysaccharide biosynthetic process (GO:0000271);; Cellular Component: cell wall (GO:0005618);; Cellular Component: plasma membrane (GO:0005886);; Biological Process: anatomical structure morphogenesis (GO:0009653);; Biological Process: multidimensional cell growth (GO:0009825);; Biological Process: tissue development (GO:0009888);; Biological Process: cell tip growth (GO:0009…	--	[TZ]	--	Formin Homology 2 Domain	Uncharacterized protein OS=Glycine max (Soybean) PE=4 SV=1	TZ	--	PREDICTED: uncharacterized LOC101211678 [Cucumis sativus]
Chr3:14927566|14953753	3.29842	csa-miRn6-3p	Csa5G524770			--	--	--	--	--	--	--	Putative uncharacterized protein GN=VIT_14s0066g01140 OS=Vitis vinifera (Grape) PE=4 SV=1	S	Function unknown	PREDICTED: uncharacterized protein LOC100247380 [Vitis vinifera]
Chr3:14927566|14953753	3.29842	csa-miRn6-3p	Csa3G251950			--	--	--	--	--	--	Cotton fibre expressed protein	Putative uncharacterized protein GN=RCOM_1443930 OS=Ricinus communis (Castor bean) PE=4 SV=1	S	Function unknown	Uncharacterized protein TCM_017399 [Theobroma cacao]
Chr3:14927566|14953753	3.29842	csa-miRn6-3p	Csa6G157050			--	--	--	--	--	--	--	Uncharacterized protein GN=PRUPE_ppa001741mg OS=Prunus persica (Peach) PE=4 SV=1	S	Function unknown	PREDICTED: uncharacterized protein LOC101204646 [Cucumis sativus]
Chr3:14927566|14953753	3.29842	csa-miRn6-3p	Csa3G119700	WRKY30	Transcription	--	--	Molecular Function: sequence-specific DNA binding transcription factor activity (GO:0003700);; Biological Process: regulation of transcription, DNA-templated (GO:0006355);; Molecular Function: sequence-specific DNA binding (GO:0043565);;	--	--	--	WRKY DNA -binding domain	Putative WRKY transcription factor 30 (Fragment) OS=Cucumis sativus (Cucumber) PE=2 SV=1	K	Transcription	putative WRKY transcription factor 30 [Cucumis sativus]
Chr3:14927566|14953753	3.29842	csa-miRn6-3p	Csa4G097690	ZIP Zinc transporter		--	--	Cellular Component: chromosome, telomeric region (GO:0000781);; Molecular Function: DNA binding (GO:0003677);; Molecular Function: sequence-specific DNA binding transcription factor activity (GO:0003700);; Molecular Function: RNA binding (GO:0003723);; Molecular Function: heme oxygenase (decyclizing) activity (GO:0004392);; Molecular Function: protein serine/threonine kinase activity (GO:0004674)…	--	--	--	ZIP Zinc transporter	Uncharacterized protein GN=F17C15_130 OS=Arabidopsis thaliana (Mouse-ear cress) PE=4 SV=1	S	Function unknown	uncharacterized protein [Arabidopsis thaliana]
